# Supplementary material for: Spatiotemporal changes, trade-offs, and synergistic relationships in ecosystem services provided by the Aral Sea Basin
Source: PeerJ. 2021 Dec 16;9:e12623. doi: 10.7717/peerj.12623 (PMC8684718; doi:10.7717/peerj.12623)
Supplement: Supplemental Information 6 [file peerj-09-12623-s006.docx]

**Table S6 Interaction of ecosystem services in the Aral Sea Basins**

| **Correlation** | **Food production** | **Raw material** | **Gas regulation** | **Climate regulation** | **Water regulation** | **Soil-formation retention** | **Waste-treatment** | **Biodiversity** | **Recreation, cultural and tourism** |
| --- | --- | --- | --- | --- | --- | --- | --- | --- | --- |
| Food production | 1.00 | .958** | .865** | .868** | -.896** | .846** | -.884** | .917** | -.801** |
| Raw material | .958** | 1.00 | .707** | .745** | -.781** | .933** | -.762** | .788** | -.758** |
| Gas regulation | .865** | .707** | 1.00 | .966** | -.922** | .473** | -.924** | .992** | -.641** |
| Climate regulation | .868** | .745** | .966** | 1.00 | -.940** | .530** | -.941** | .969** | -.649** |
| Water regulation | -.896** | -.781** | -.922** | -.940** | 1.00 | -.654** | 1.000** | -.935** | .863** |
| Soil-formation retention | .846** | .933** | .473** | .530** | -.654** | 1.00 | -.632** | **.571** | -.803** |
| Waste-treatment | -.884** | -.762** | -.924** | -.941** | 1.000** | -.632** | 1.00 | -.934** | .855** |
| Biodiversity | .917** | .788** | .992** | .969** | -.935** | .571** | -.934** | 1.00 | -.684** |
| Recreation, cultural and tourism | -.801** | -.758** | -.641** | -.649** | .863** | -.803** | .855** | -.684** | 1.00 |

**P < 0.01; *p <0.05
